# Supplementary material for: Identification of a Rice stripe necrosis virus resistance locus and yield component QTLs using Oryza sativa × O. glaberrima introgression lines
Source: Springer Nature journal article supplement (doi:10.1186/1471-2229-10-6), 2010-01-08
Supplement: 12870_2009_500_MOESM6_ESM.pdf [file 12870_2009_500_MOESM6_ESM.pdf]

Caíapo ♀ x MG12 ♂ → F<sub>1</sub> x Caíapo → BC<sub>1</sub>F<sub>1</sub> x Caíapo → BC<sub>2</sub>F<sub>1</sub> x Caíapo  
↓  
BC<sub>3</sub>DH ← Anther culture ← BC<sub>3</sub>F<sub>1</sub> x Caíapo
