# Supplementary figures and images for: Identification of a Rice stripe necrosis virus resistance locus and yield component QTLs using Oryza sativa × O. glaberrima introgression lines
Source: Springer Nature journal article supplement (doi:10.1186/1471-2229-10-6), 2010-01-08

**
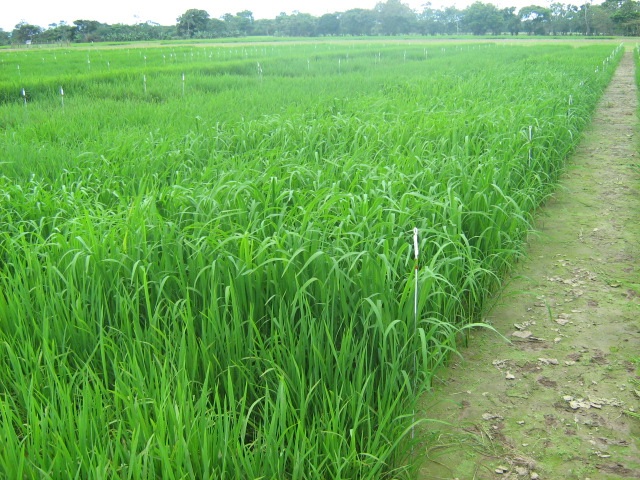
**

Supplement: Additional file 1 [file 1471-2229-10-6-s1.doc]

Legend:  Caiapo  IRGC 103544  Heterozygote  Missing data

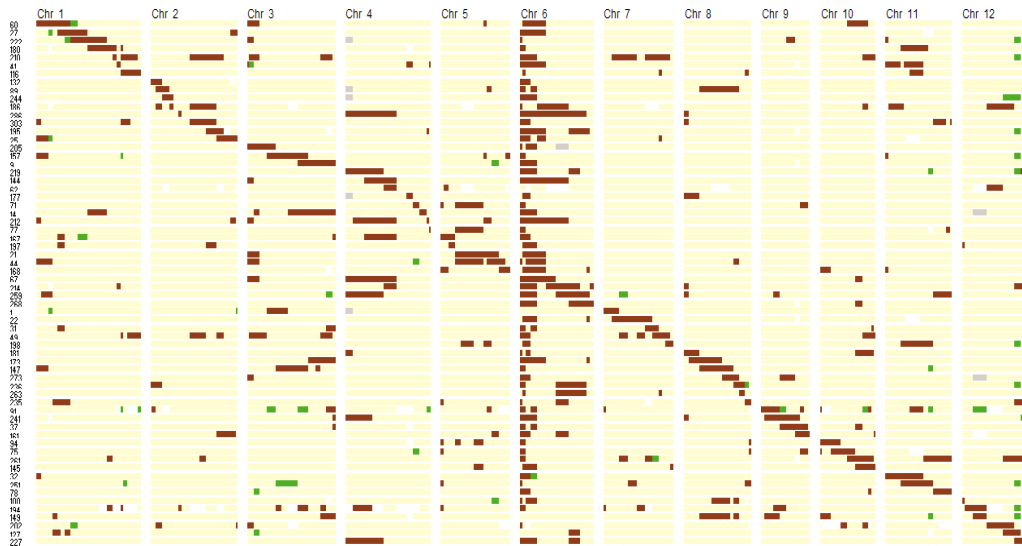

Supplement: 12870_2009_500_MOESM2_ESM.pdf [file 12870_2009_500_MOESM2_ESM.pdf]

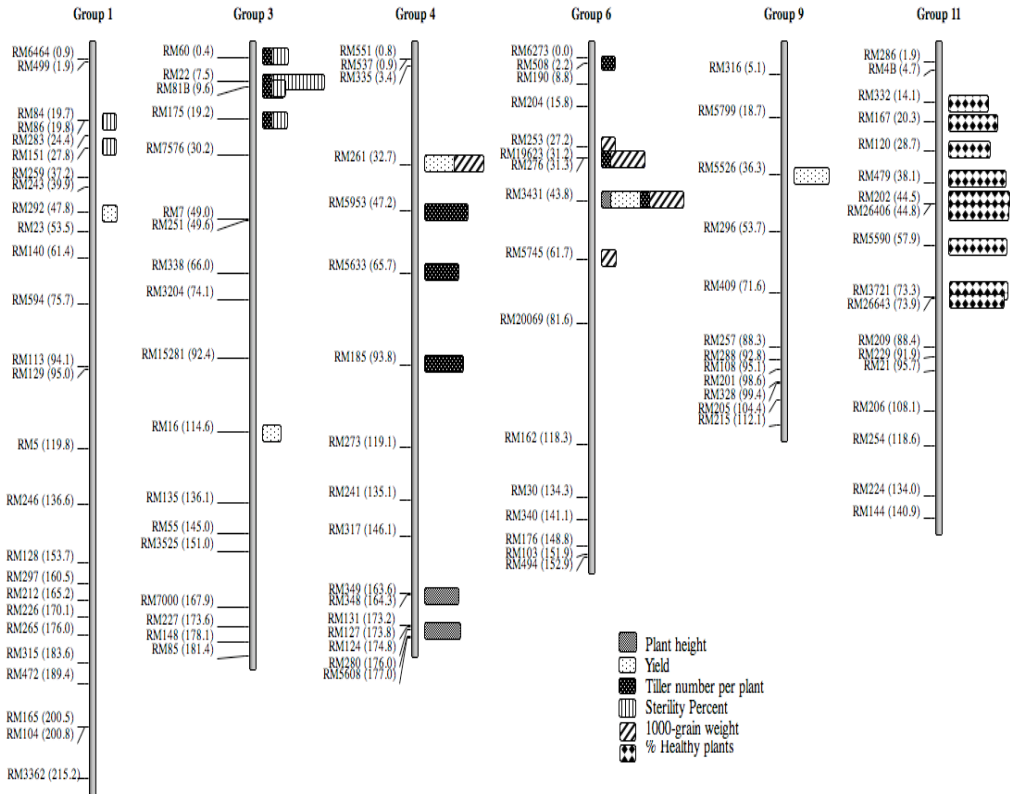

Supplement: 12870_2009_500_MOESM3_ESM.pdf [file 12870_2009_500_MOESM3_ESM.pdf]

Legend: Recurrent Donor Heterozygote Missing data

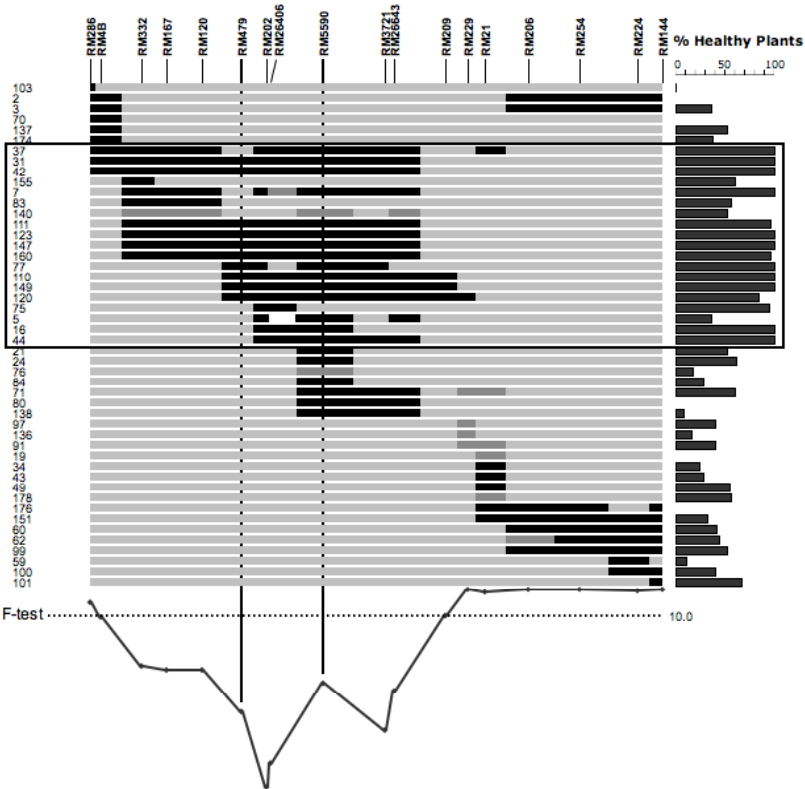

Supplement: 12870_2009_500_MOESM4_ESM.pdf [file 12870_2009_500_MOESM4_ESM.pdf]

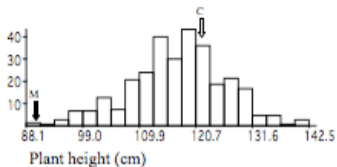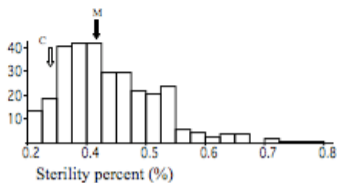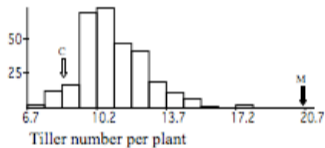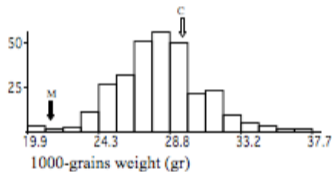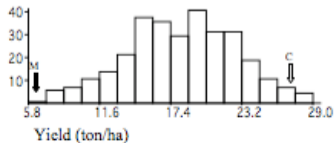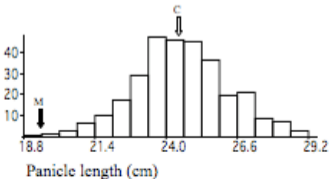

Supplement: 12870_2009_500_MOESM5_ESM.pdf [file 12870_2009_500_MOESM5_ESM.pdf]

**A**

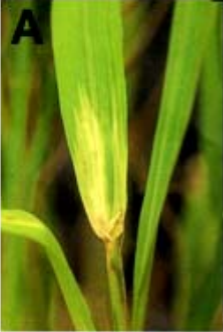

**B**

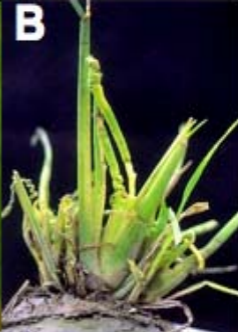

Supplement: 12870_2009_500_MOESM7_ESM.pdf [file 12870_2009_500_MOESM7_ESM.pdf]
